# Supplementary material for: Separate and overlapping specificities in rheumatoid arthritis antibodies binding to citrulline- and homocitrulline-containing peptides related to type I and II collagen telopeptides
Source: PubMed Central journal article supplement (PMC4320812; doi:10.1186/s13075-014-0515-z), 2015-01-09
Supplement: 13075_2014_515_MOESM1_ESM.pdf [file 13075_2014_515_MOESM1_ESM.pdf]

Additional patient data. Anti-CCP and anti-MCV results are from direct ELISA, positivity was defined by the calibration series supplied by the manufacturer. For the other assays, results from inhibition-ELISAs are shown. Positivity was defined by inhibition values exceeding the mean + 2SD of controls. Erosions and RF were categorized as +, - or +/- . The borderline cases were defined as positive in logistic regression analysis. Gender is shown by one letter abbreviations: m, male and f, female. For the abbreviations of collagen telopeptide antigens, see Table 1.
